1 **Peptidoglycan associated cyclic lipopeptide disrupts viral infectivity**

2

3

4 Bryan A. Johnson<sup>1</sup>, Adam Hage<sup>1</sup>, Birte Kalveram<sup>2</sup>, Megan Mears<sup>2</sup>, Jessica A. Plante<sup>3,1</sup>, Sergio  
5 E. Rodriguez<sup>1</sup>, Zhixia Ding<sup>2,5</sup>, Xuemei Luo<sup>4,6</sup>, Dennis Bente<sup>1</sup>, Shelton S. Bradrick<sup>4</sup>, Alexander N.  
6 Freiberg<sup>2</sup>, Vsevolod Popov<sup>2,5</sup>, Ricardo Rajsbaum<sup>1,7</sup>, Shannan Rossi<sup>1,2</sup>, William K. Russell<sup>4,6</sup>,  
7 Vineet D. Menachery<sup>1,7</sup>;

8 *<sup>1</sup>Department of Microbiology and Immunology, <sup>2</sup>Department of Pathology, <sup>3</sup>World Reference*  
9 *Center for Emerging Viruses and Arboviruses, <sup>4</sup>Department of Biochemistry and Molecular*  
10 *Biology, <sup>5</sup>UTMB Electron Microscopy Laboratory, <sup>6</sup>UTMB Mass Spectrometry Facility, <sup>7</sup>Institute*  
11 *for Human Infections and Immunity, University of Texas Medical Branch at Galveston*

1 **Abstract**

2 Enteric viruses exploit bacterial components including lipopolysaccharides (LPS) and  
3 peptidoglycan (PG) to facilitate infection in humans. With origins in the bat enteric system, we  
4 wondered if severe acute respiratory syndrome-coronavirus (SARS-CoV) or Middle East  
5 respiratory syndrome-CoV (MERS-CoV) also use bacterial components to modulate infectivity.  
6 To test this question, we incubated CoVs with LPS and PG and evaluated infectivity finding no  
7 change following LPS treatment. However, PG from *B. subtilis* reduced infection >10,000-fold  
8 while PG from other bacterial species failed to recapitulate this. Treatment with an alcohol  
9 solvent transferred inhibitory activity to the wash and mass spectrometry revealed surfactin, a  
10 cyclic lipopeptide antibiotic, as the inhibitory compound. This antibiotic had robust dose- and  
11 temperature-dependent inhibition of CoV infectivity. Mechanistic studies indicated that surfactin  
12 disrupts CoV virion integrity and surfactin treatment of the virus inoculum ablated infection *in*  
13 *vivo*. Finally, similar cyclic lipopeptides had no effect on CoV infectivity and the inhibitory effect  
14 of surfactin extended broadly to enveloped viruses including influenza, Ebola, Zika, Nipah,  
15 Chikungunya, Una, Mayaro, Dugbe, and Crimean-Congo hemorrhagic fever viruses. Overall,  
16 our results indicate that peptidoglycan-associated surfactin has broad virucidal activity and  
17 suggest bacteria byproducts may negatively modulate virus infection.

1 **Importance**

2 In this manuscript, we considered a role for bacteria in shaping coronavirus infection. Taking  
3 cues from studies of enteric viruses, we initially investigated how bacterial surface components  
4 might improve CoV infection. Instead, we found that peptidoglycan-associated surfactin is a  
5 potent viricidal compound that disrupts virion integrity with broad activity against enveloped  
6 viruses. Our results indicate that interactions with commensal bacterial may improve or disrupt  
7 viral infections highlighting the importance of understanding these microbial interactions and  
8 their implications for viral pathogenesis and treatment.

9

1 \Body

## 2 **Introduction**

3 Commensal bacteria inhabit nearly every surface of the human body, influencing numerous host  
4 processes (1, 2). While considered to serve a protective role, recent studies indicate enteric  
5 viruses exploit bacterial envelope components to facilitate infection (3). Poliovirus was found to  
6 bind both lipopolysaccharides (LPS) and peptidoglycan (PG) to enhance its thermostability and  
7 receptor affinity, facilitating *in vivo* infection (3). Antibiotic depletion of commensal bacteria  
8 inhibited oral poliovirus infection, but was rescued by recolonization, pretreatment of virus with  
9 LPS, or bypassing the enteric system through intraperitoneal injection (3). Other viruses  
10 including reovirus, mouse mammary tumor virus, and murine norovirus have been shown to use  
11 similar mechanisms to facilitate infection (3, 4). Together, these results indicate a key role for  
12 commensal bacteria in improving infectivity and pathogenesis of enteric viruses.

13 Like the enteric system, the respiratory tract harbors high levels of commensal bacteria (1).  
14 Given the origins of Severe Acute Respiratory Syndrome-Coronavirus (SARS-CoV) and Middle  
15 East Respiratory Syndrome (MERS)-CoV in the bat enteric system (5), we wondered if CoVs  
16 utilized bacterial components to facilitate infection. Previous work had identified a key role for  
17 the TLR pathways in immunity to SARS-CoV with the absence of LPS binding TLR4 or its  
18 downstream adaptors resulting in augmented disease (6-8). Given the interactions observed  
19 between enteric viruses and bacterial components, CoVs may also use similar microbial  
20 components to improve infectivity and subsequently stimulate the TLR4 response.

21 In this study, we explored the relationship between bacterial surface components and CoV  
22 infection. Surprisingly, we found PG from *Bacillus subtilis* reduced CoV infectivity. Using mass  
23 spectrometry, we identified a cyclic lipopeptide (CLP), surfactin, as the molecule responsible for  
24 CoV inhibition. Surfactin's inhibitory effect was dose and temperature dependent with treatment

1 disrupting the integrity of the CoV particle. Notably, surfactin treatment of the inoculum ablated  
2 CoV infection *in vivo*, but prophylactic treatment had no effect. Other similar CLPs had no effect  
3 on CoV infectivity suggesting surfactin's virucidal properties were unique. Importantly, surfactin  
4 treatment reduced the infectivity of several other enveloped viruses, including influenza A, Zika,  
5 Dugbe, Nipah, Crimean-Congo Hemorrhagic Fever, chikungunya, Mayaro, Una, and Ebola  
6 viruses. Together, these results demonstrate the efficacy of surfactin as a virucidal compound  
7 and highlight the potential for microbial environment to modulate virus infection.

## 1 **Results**

### 2 **Peptidoglycan derived from *B. subtilis* reduces with coronavirus infectivity.**

3 Given their origins in bat enteric systems, we wondered if CoVs might be stabilized by bacterial  
4 components (5). To test this possibility, Human CoV-229E, a common cold associated CoV,  
5 and MERS-CoV were treated with control (PBS), LPS (*Escherichia coli*) or PG (*Bacillus subtilis*)  
6 and viral infectivity was determined (**Fig. 1A**). In contrast to enteric viruses, LPS had no effect  
7 on CoV infectivity; however, the presence of PG from *B. subtilis* dramatically reduced the  
8 infectivity of both HCoV-229E and MERS-CoV (**Fig. 1B**). The structure of PG varies  
9 considerably between bacterial species (9), suggesting that PG from different bacteria may  
10 have distinct effects on CoV infectivity. To explore this, we tested a diverse set of bacterial  
11 derived PGs for the ability to modulate CoV infection (**Fig. 1C**). Notably, only PG derived from  
12 *B. subtilis* reduced HCoV-229E and MERS-CoV infection, suggesting that interference with CoV  
13 infectivity is not shared by PG from all bacterial species.

14 Next, we wondered if incubation temperature also played a role in *B. subtilis* PG reduction of  
15 CoV infectivity. To investigate, HCoV-229E and MERS-CoV stocks were treated with *B. subtilis*  
16 PG at room temperature (RT), 32°C, or 37°C (**Fig. 1D-E**). Interestingly, PG disruption of viral  
17 infectivity was reduced at lower temperatures. For HCoV-229E, infectivity had a step-wise  
18 reduction with increasing temperature (**Fig. 1D**). In contrast, PG reduction of MERS-CoV  
19 infectivity was ablated at lower temperatures, with no significant loss of viral infectivity at either  
20 RT or 32°C (**Fig. 1E**). Together, these data indicate that the inhibitory effect of *B. subtilis* PG is  
21 influenced by incubation temperature.

### 22 **Infectivity inhibition can be disassociated from PG**

23 Two possible scenarios explain why only *B. subtilis* PG reduces CoV infectivity: 1) *B. subtilis* PG  
24 reduces infectivity directly, using unique structural features absent in PG from other bacteria; or  
25 2) the PG preparation contains another compound that mediates inhibition. To differentiate  
26 these possibilities, we exploited the poor solubility of PG, washing it in a variety of solvents to

1 separate its inhibitory effect (Fig. 2A). After three washes in PBS, PG maintained its reduction of  
2 HCoV-229E infectivity (**Fig. 2A**). In contrast, PG washed with either 100% ethanol or DMSO lost  
3 the ability to inhibit HCoV-229E infectivity (**Fig. 2A**). These results suggest that the washes  
4 either modified the inhibitory capacity of PG or removed a soluble compound responsible for  
5 reducing CoV infectivity. To explore this, the supernatants from clarified PG samples were  
6 incubated with HCoV-229E (**Fig. 2B**). While the PBS, PBS control, and ethanol control had no  
7 inhibitory effect, the ethanol supernatant from PG potently reduced viral infectivity of HCoV-  
8 229E (**Fig. 2B**). Together, these data indicate that a soluble compound distinct from, but  
9 present in the PG sample, is responsible for reducing CoV infectivity.

#### 10 **Mass spectrometry identifies the inhibitor as surfactin.**

11 Having isolated the inhibitory molecule, we utilized mass spectrometry to determine its identity.  
12 Unwashed *B. subtilis* PG and ethanol supernatants were analyzed using MALDI-TOF/TOF  
13 mass spectrometry (**Fig. 2C**). In the PG samples, three prominent peaks were observed with  
14 masses of 1010.5, 1058.7, and 1238.6 (**Fig. 2C**). While all of these peaks were present in the  
15 ethanol supernatant, the compound with a mass 1058.7 was enriched nearly 10-fold (**Fig. 2D**).  
16 Further analysis of this peak by fragmentation produced a spectrum matching that of the cyclic  
17 lipopeptide surfactin (10) a potent biosurfactant produced naturally by *B. subtilis* and shown  
18 previously to have antimicrobial and antiviral properties (11, 12) (**Fig 2E**, for structure see **Fig**  
19 **6A**). Given its abundance, enrichment in the ethanol wash, as well as its described antiviral  
20 properties, we concluded that surfactin likely conferred the *B. subtilis* PG with the ability to  
21 interfere with CoV infection.

#### 22 **Reduction of CoV infectivity by surfactin is temperature- and dose-dependent**

23 To confirm its inhibitory effect, we characterized the ability of purified surfactin to reduce CoV  
24 infectivity. HCoV-229E, MERS-CoV, or SARS-CoV were treated with PBS or surfactin at either  
25 RT, 32°C, or 37°C. For all three CoVs, surfactin reduced infectivity after treatment at 37°C, with  
26 a near complete loss of infectious virus (**Fig. 3A-C**). Similar to *B. subtilis* PG, the degree of

1 reduction varied based on incubation temperature and varied between the CoVs (**Fig. 3A-C**). To  
2 further characterized the kinetics of inhibition, HCoV-229E and MERS-CoV were treated with  
3 surfactin at 4°C, RT, 32°C, or 37°C and sampled over a time-course (**Fig. 3D-E**). At both 32°C  
4 and 37°C, surfactin rapidly reduced HCoV-229E and MERS-CoV, with a near complete loss of  
5 infectivity after two hours of treatment (**Fig. 3D-E**). In contrast RT incubation reduced CoV  
6 infectivity more slowly and, surfactin's effects were ablated at 4°C. We also observed dose  
7 dependent changes in surfactin activity against HCoV-229E, MERS-CoV, and SARS-CoV (**Fig.**  
8 **3F**). Interestingly, higher concentrations of surfactin were required for inhibition of HCoV-229E  
9 when compared to either SARS-CoV or MERS-CoV, whose inhibition curves were nearly  
10 identical. Together, these data indicate that both temperature and dose impact surfactin's  
11 inhibitory effects.

#### 12 **Surfactin reduces CoV infectivity by disrupting the structural integrity of viral particles.**

13 Prior studies with surfactin offers two mechanisms for virucidal activity: disruption of the viral  
14 membrane or inhibition of host-virus membrane fusion (11-13). To determine if virion integrity  
15 was maintained, we performed RNase I protection assays. Following surfactin treatment,  
16 particles were exposed to RNase I to digest exposed viral RNA; samples were subsequently  
17 extracted for RNA and relative viral RNA determined by quantitative reverse transcription real  
18 time PCR (RT-qPCR). Increasing surfactin concentrations correlated with a decrease in viral  
19 RNA and viral titer for both HCoV-229E (**Fig. 4A**) and MERS-CoV (**Fig. 4B**). These results  
20 indicate that disruption of virion integrity is the primary mechanism by which surfactin inhibits  
21 CoV infection. To confirm these results, we performed transmission electron microscopy (TEM)  
22 on HCoV-229E treated with surfactin or PBS. In PBS-treated samples, numerous intact HCoV-  
23 229E particles could be visualized (**Fig. 4C-D**); in contrast, no viral particles were found in any  
24 of the surfactin treated samples (**Fig. 4D**). Taken together these results demonstrate that  
25 surfactin inhibits CoV infection primarily through the disruption of viral particles.

#### 26 ***In vivo* characterization of surfactin on CoV infection**



1 With no approved therapeutics (14), emerging, zoonotic CoVs pose a significant threat to public  
2 health (15, 16). Therefore, we wanted to examine the potential of surfactin to treat infections *in*  
3 *vivo*. We tested whether direct treatment of the inoculum reduced *in vivo* infection and disease.  
4 SARS-CoV ( $10^4$  plaque forming units (PFU)) was treated with PBS or surfactin and used to  
5 infect BALB/c mice intranasally (IN). Mice were monitored over 4 days for weight loss and  
6 lethality, with lung titers determined at 2- and 4-days post infection. As expected, animals  
7 infected with PBS treated virus experienced rapid weight loss and exhibited high lung titers at  
8 both 2- and 4-days post infection (**Fig. 5A**). In contrast, mice infected with surfactin treated  
9 SARS-CoV lost no weight and no infectious virus was detected in their lungs (**Fig. 5B**).  
10 Additionally, mock infected mice receiving surfactin alone demonstrated no signs of disease or  
11 weight loss, suggesting that surfactin treatment alone does not have any pathological effects  
12 (**Fig. 5A**).

13 To examine therapeutic potential, we next evaluated if pretreatment with surfactin could reduce  
14 respiratory CoV disease. BALB/c mice were treated IN with 50  $\mu$ l of either PBS control or  
15 surfactin daily, starting 18 hours prior to infection, and continuing over the first two days of  
16 infection. Mice were subsequently infected with  $10^4$  PFU of SARS-CoV (MA15) and monitored  
17 for weight loss and lethality, with lung titer determined at 2 and 4 days post-infection. In contrast  
18 to the surfactin-treated inoculum, prophylactic surfactin treatment had no effect on weight loss  
19 (**Fig. 5C**) or viral titer in the lung (**Fig. 5D**). These results indicate that prophylactic surfactin  
20 treatment by this route does not reduce SARS-CoV disease in this mouse model.

### 21 **Effects of other cyclic lipopeptides on CoV infectivity.**

22 Surfactin belongs to a family of 80 natural antibiotic compounds referred to as cyclic  
23 lipopeptides (CLPs) (11). While structurally diverse, all CLPs share two key features: a non-  
24 polar hydrocarbon tail and a non-ribosomally produced peptide ring (11, 12). While many CLPs  
25 have been found to be antifungal and antibacterial, antiviral properties have not been described  
26 except for surfactin, (11, 12). Therefore, we tested six CLPs for the ability to reduce CoV

1 infectivity (**Fig. 6A**). Despite similar biochemical structures, none of the CLPs tested had a  
2 significant effect on HCoV-229 or MERS-CoV infection (**Fig. 6B**). These results suggest that  
3 unique features allow surfactin to reduce CoV infectivity.

#### 4 **Surfactin broadly reduces viral infectivity**

5 With its potent antiviral properties against CoVs, we wanted to test surfactin's effect against  
6 other highly pathogenic viruses. Given its ability to disrupt virion integrity, we focused on  
7 enveloped viruses from diverse families including two Influenza A strains (H1N1, H3N2), Zika  
8 Virus (ZIKV), Dugbe Virus (DUGV), Nipah Virus (NiV), Crimean-Congo Hemorrhagic Fever  
9 Virus (CCHFV), Chikungunya Virus (CHIKV), Mayaro virus, Una virus, and Ebola virus (EBOV).  
10 As a negative control, we tested the non-enveloped Coxsackievirus B3 (CVB3). Each virus was  
11 treated with either PBS or surfactin and viral infectivity determined. As expected, surfactin had  
12 no effect on the non-enveloped CVB3 (**Fig. 6C**). In contrast, surfactin significantly reduced  
13 infectivity in each of the enveloped viruses (**Fig. 6C**), but the magnitude of effect was not  
14 uniform. Most enveloped viruses were reduced either below their limit of detection or greater  
15 than 100,000-fold. In contrast, Mayaro, both influenza strains, and EBOV exhibited some  
16 resistance, having their infectious titer reduced only 2.6, 2.7, 2.4, and 1.6 logs, respectively.  
17 These data suggest that while surfactin treatment broadly reduced the infectivity of enveloped  
18 viruses, factors beyond the mere presence or absence of an envelope may govern overall  
19 sensitivity.

## 1 Discussion

2 In this study, we explored the relationship between bacterial components and CoV infection.  
3 While initially predicting enhanced infection, treatment with *B. subtilis* PG reduced CoV  
4 infectivity, while envelope components from other bacteria had no effect. Separating the  
5 inhibitory effect using solvent washes, we used mass spectrometry to identify that the CLP  
6 surfactin was responsible for reduced CoV infectivity and disruption of virion integrity.  
7 Unfortunately, despite efficacy against the inoculum, prophylactic surfactin treatment prior to  
8 infection had no effect on CoV related disease *in vivo*. Notably, other CLPs had no effect on  
9 CoV infectivity despite having similar biochemical structures. Finally, we found that surfactin  
10 treatment was efficacious against many enveloped viruses *in vitro* including IAV strains H1N1  
11 and H3N2, ZIKV, DUGV, NiV, CCHFV, CHIKV, Una, Mayaro, and EBOV. Together, these data  
12 demonstrate that surfactin is a potent virucide and highlight that interactions with bacterial  
13 derived compounds can also negatively modulate virus infection.

14 Over the last two decades, surfactin has been shown to be anti-bacterial, anti-fungal, and anti-  
15 viral (11, 12, 17-19). Mechanistically, surfactin's broad anti-microbial efficacy has been linked to  
16 disruption of lipid membranes (13). However, more recently, researchers described surfactin's  
17 efficacy against the animal CoV porcine epidemic diarrhea virus (PEDV), and suggested that  
18 surfactin inhibited viral-host membrane fusion (19). In contrast to the PEDV results, we found  
19 that surfactin treatment disrupted virion integrity, exposing the viral RNA to RNase I mediated  
20 degradation (**Fig. 4A-B**). Transmission electron microscopy (TEM) confirmed the absence of  
21 intact virions in surfactin treated samples (**Fig. 4C**). Thus, while both PEDV and human CoVs  
22 are sensitive to surfactin treatment, infectivity reduction may be the result of different  
23 mechanisms due to differences the surfactin dose, virion composition, tissue environment  
24 (respiratory vs enteric), or other factor.

1 Similar to the question of mechanism, *in vivo* efficacy of surfactin also varied between PEDV  
2 and human CoVs. While surfactin ablates SARS-CoV disease when treating the inoculum,  
3 prophylactic treatment was not protective. Why surfactin failed to protect mice against SARS-  
4 CoV is puzzling, given that efficacy of prophylactic oral surfactin treatment against PEDV  
5 disease (19). One explanation is the physical environment of the respiratory and gastrointestinal  
6 tracts differs significantly, making intranasal (IN) surfactin administration ineffective due to tissue  
7 specific differences. Thus, while oral surfactin administration may be effective at delivering  
8 surfactin to infected gastrointestinal tissue, IN administration may not be as effective,  
9 particularly in the lower parts of the lung. Alternative delivery methods such as the inhalation of  
10 an aerosolized surfactin may overcome these problems. Additionally, several surfactin  
11 derivatives exist and may enhance its virucidal activity in the context of respiratory infection *in*  
12 *vivo* (11, 12).

13 In addition to CoVs, we examined surfactin's virucidal efficacy against other enveloped viruses,  
14 discovering broad efficacy, but wide variation. While all tested enveloped viruses were sensitive  
15 to surfactin treatment, IAV strains H1N1 and H3N2, Mayaro, and EBOV demonstrated a degree  
16 of resistance. These data suggest that factors beyond the mere presence of a viral envelope  
17 regulate surfactin efficacy. One possible factor is the lipid content of the viral envelope. Previous  
18 studies have shown that membranes enriched in cholesterol and phosphatidylethanolamines  
19 (PE) are resistant to surfactin permeabilization, while membranes containing  
20 phosphatidylcholines (PC) are more sensitive (20). The envelope of Influenza A viruses have  
21 been reported to be enriched for both cholesterol and PE (21), providing support for this  
22 hypothesis. Unfortunately, the lipid content of the other viruses tested have not been  
23 determined, preventing direct comparison. Nevertheless, some broad observations are worth  
24 mentioning. CoVs, ZIKV, and bunyaviruses (CCHFV and DUGV) derive their envelopes from  
25 either the Golgi Apparatus and Endoplasmic Reticulum, organelles enriched in surfactin

1 sensitive PC (22) . NiV (23), IAV (24), EBOV (25) are thought to derive their envelopes from  
2 lipid rafts of the plasma membrane , which could specify their lipid content and thus surfactin  
3 sensitivity. Alphaviruses such as CHIKV, Mayaro, and Una also bud form the plasma  
4 membrane, though neither the lipid content, nor the involvement of lipid rafts has been explored  
5 (26). Together, these observations suggest the lipid content of enveloped viruses may explain  
6 their differential sensitivity to surfactin.

7 The failure of other CLPs to reduce CoV infectivity is also surprising, given the structural  
8 similarity to surfactin. In particular, Iturin A is both biochemically similar to surfactin and has  
9 also been reported to disrupt lipid membranes (**Fig. 6A**) (11). A possible explanation involves  
10 differences in their mechanisms of action. Surfactin penetrates lipid layers, alone solubilizing  
11 and permeabilizing them (13). In contrast, Iturin A must interact with sterol components to cause  
12 membrane permeabilization, explaining its broad anti-fungal, but only selective antibacterial  
13 activity (11). However, Iturin A is also quite hemolytic (11, 12), making it unclear why the  
14 membranes of enveloped viruses grown in mammalian cells would not also be susceptible to  
15 this mechanism, due to the presence of sterols. Compounding this mechanistic uncertainty,  
16 daptomycin's permeabilization of membranes requires no such interaction, but CoVs are  
17 resistant to its effects as well (27) (**Fig. 6B**). The results argue that surfactin possesses unique  
18 properties conferring its virucidal activity. Surfactin is known to adopt a unique  $\beta$ -sheet like  
19 "horse-saddle" conformation, which may facilitate membrane permeabilization (13). Molecular  
20 dynamics simulations suggest temperature directly regulates the openness of the horse saddle  
21 structure and may explain why surfactin's virucidal activity is also temperature sensitive (28). In  
22 total, these results highlight our poor understanding of membrane disruption by CLPs and  
23 argues that biochemical studies of these compounds inhibition of enveloped viruses are  
24 needed.

1 While the microbiome has historically been thought to serve a protective role against pathogens  
2 (1, 2), recent studies with viruses complicate this view. Studies with poliovirus demonstrated  
3 that the presence of commensal bacteria is necessary for oral poliovirus infection in mice (29).  
4 Similar findings with other enteric viruses suggest that utilizing bacterial components is a  
5 common approach. In contrast, our results add further complexity, demonstrating that surfactin,  
6 a secondary metabolite of *B. subtilis*, can potently reduce CoV infectivity. Though *B. subtilis* is  
7 not generally part of the human microbiome (30), it is often used as an intestinal probiotic and  
8 has been found to transiently persist in the gut (31). Additionally, surfactin-like molecules are  
9 produced by a broad array of bacterial species (11, 32-34). For example, the novel surfactin like  
10 CLP Coryxin was recently found to be produced by *Corynebacterium xerosis*, a common  
11 member of the respiratory microbiome (34). These facts suggest that microbial components  
12 typically thought to work against bacterial competitors could also potentially disrupt viral  
13 infection. Thus, as the relationship between the microbiome and viral infections is further  
14 explored, the role bacterial metabolites such as surfactin and other CLPs play in modulating  
15 infection must be considered in viral disease. Overall, these results highlight the dynamic  
16 microbial environment and its potential to impact viral pathogenesis as well as identify novel  
17 inhibitory factors for therapeutic use.

18

## 1 **Materials and Methods**

2 **Viruses, cells, and *in vitro* infection.** HCoV-229E, provided by the World Reference Center  
3 for Emerging Viruses and Arboviruses (WRCEVA), was propagated on HUH7 cells grown in  
4 DMEM (Gibco), 10% fetal bovine serum (Hyclone), and 1% antibiotic-antimycotic (A/A) (Gibco).  
5 Titration was performed by TCID<sub>50</sub> in HUH7 cells and calculated by the Spearman-Kärber  
6 Method. MERS-CoV (EMC-2012 strain) (35) and recombinant SARS-CoV (MA15) (36) were  
7 titrated and propagated on VeroCCL81 and VeroE6 cells, respectively, grown in DMEM with 5%  
8 fetal bovine serum and 1% A/A. Standard plaque assays were used for SARS- and MERS-CoV  
9 (37, 38). Cocksackievirus B3 (39), chikungunya (40), Nipah (41), Dugbe (42), Zika (43),  
10 Crimean-Congo hemorrhagic fever (42), Influenza A H1N1(A/California/04/09) H3N2  
11 (A/Panama/2007/99) (44), and Ebola viruses (45) were propagated and quantitated via standard  
12 methods. All experiments involving infectious virus were conducted at the University of Texas  
13 Medical Branch (Galveston, TX) in approved biosafety level 2, 3, or 4 (BSL) laboratories and  
14 animal facilities, with routine medical monitoring of staff.

15 **Treatment with bacterial surface components and cyclic lipopeptides.** CoVs were diluted  
16 10% vol/vol in solutions with final concentrations of 1 mg/ml (PG and LPS) or 100 µg/ul (CLPs)  
17 unless otherwise specified in the text. For alcohol wash experiments, samples instead diluted  
18 5% vol/vol. Treated samples were then incubated for 2 hours at 37°C, after which they were  
19 titrated. Bacterial components were purchased from Sigma-Aldrich; lipopolysaccharides from  
20 *Escherichia coli* (L4130), peptidoglycan *Bacillus subtilis* (69554), *Staphylococcus aureus*  
21 (77140), *Streptomyces spp.* (79682), and *Micrococcus luteus* (53243). Peptidoglycan from  
22 *Escherichia coli* (PGN-EB) was purchased from Invivogen. For each surface component, stock  
23 solutions were created by suspending the component in PBS and stored and -20°C. The cyclic  
24 lipopeptides surfactin (S3523), iturin A (I1774), fengycin (SMB00292), polymyxin B (P1004),

1 colisitn (C4461), ramoplanin (R1781), and daptomycin (D2446) were also purchased from  
2 Sigma-Aldrich.

3 **Mass spectrometry.** Stock peptidoglycan was centrifuged at 15,000g for 1 minute in a table top  
4 centrifuge and the insoluble PG fraction was then resuspended in 100% ethanol. Following a 5-  
5 minute incubation at room temperature, samples were centrifuged, and the supernatant and  
6 insoluble fractions were used for treatment of viruses or delivered to the mass spectrometry  
7 core facility. 1  $\mu$ l of peptidoglycan was combined 1:1 with a 10 mg/ml  $\alpha$ -cyano-4-  
8 hydroxycinnamic acid (60% acetonitrile) and spotted onto MALDI targets. All MALDI-MS  
9 experiments were performed using a 5800 MALDI-TOF/TOF (Applied Biosystems). The MS  
10 data were acquired using the reflectron detector in positive mode (700–4500 Da, 1900 Da focus  
11 mass) using 300 laser shots (50 shots per sub-spectrum). Collision induced dissociation tandem  
12 MS spectra were acquired using 1 kV of collision energy. Fragmentation data was analyzed  
13 manually to determine structural information.

14 **Transmission Electron Microscopy.** HCoV-229E virions were visualized by transmission  
15 electron microscopy (TEM) through negative staining with 2% Uranyl acetate (46). Briefly, 200  
16 mesh formvar carbon-coated copper grids (FCF200-CU) from Electron Microscopy Sciences  
17 were treated for 20 minutes with HCoV-229E samples. Excess sample solution was then wicked  
18 off with filter paper, and each grid was then stained for 45 seconds with 2% Uranyl-acetate  
19 solution. Excess stain was again wicked off with filter paper. Grids were then dried and  
20 visualized on a Philips CM100 TEM Electron microscope. Images were recorded with a Gatan  
21 Orius SC200 CCD camera. In order to ensure even counting, 10 pictures were taken on 3  
22 different cells on each grid. No more than 10 minutes were allotted for looking for virus in each  
23 cell.

24 **RNase I protection assay.** Assays were performed in accordance with standard protocols  
25 described previously (47). Briefly, Samples were treated either with or without 250U RNase I for



1 30 minutes. To halt RNA digestion and inactivate RNase I, 2 times volume of Viral RNA Buffer  
2 from Zymo Research (R1034-1-100) with 2-mercaptoethanol was added. RNA was then  
3 extracted using the Quick-RNA Viral Kit from Zymo Research (R1035). RNA was then  
4 converted into cDNA using the iScript cDNA synthesis Kit (170-8891) from Bio-Rad.  
5 Quantitative real time PCR was performed using SsoAdvanced Universal SYBR Green  
6 Supermix (172-5271) from Bio-Rad. HCoV-229E specific primer sequences were Forward: 5-  
7 TGACATTCGCGACTACAAGC-3 and Reverse: 5-TAACGGTGGTTTGGCTTTTC-3. MERS-CoV  
8 specific primer sequences were Forward: 5-TCGCTTGGCAAATGAGTGTG-3 and Reverse: 5-  
9 ACATTAGCAGTTGTCGCCTG-3.

10 **Statistical analysis.** All statistical comparisons in this manuscript involved the comparison  
11 between 2 groups, untreated control virus and peptidoglycan/surfactin treated virus. Thus,  
12 significant differences in viral titer, TEM counts, RNA levels, and weight loss were determined  
13 by the unpaired two-tailed students T-Test.

14 **Ethic Statement.** This study was carried out in accordance with the recommendations for care  
15 and use of animals by the Office of Laboratory Animal Welfare, National Institutes of Health.  
16 The Institutional Animal Care and Use Committee (IACUC) of University of Texas Medical  
17 Branch (UTMB) approved the animal studies under protocol 1711065 and 1707046.

18 **Mice and *in vivo* infection.** Ten-week old BALB/c mice were purchased from Charles River  
19 Laboratories and maintained in Sealsafe™ HEPA-filtered air in/out units. Animals were  
20 anesthetized with isoflurane and infected intranasally (IN) with  $10^4$  PFU in 50  $\mu$ l of phosphate-  
21 buffered saline (PBS). Infected animals were monitored for weight loss, morbidity, and clinical  
22 signs of disease, and lung titers were determined as described previously (48). For experiments  
23 involving prophylactic treatment with surfactin, 50  $\mu$ l of 100  $\mu$ g/ml surfactin-PBS was IN  
24 administered to anesthetized animals 18 hours prior to infection with additional treatments on

1 day 0, day 1, and day 2. Infected animals were weighed daily, and lungs collected 2 and 4 days  
2 post-infection for downstream analysis by plaque assay.

3 **Acknowledgements.** Research was supported by grants from NIA and NIAID of the NIH  
4 (U19AI100625 and R00AG049092 to VDM; R01AI134907, R21AI126012, R21AI132479-01 to  
5 RR; R24AI120942 to WRCEVA). Research was also supported by STARs Award provided by  
6 the University of Texas System to VDM and trainee funding provided by the McLaughlin  
7 Endowment at UTMB.

## 8 **References**

- 9 1. Man WH, de Steenhuijsen P, Bogaert D. 2017. The microbiota of the respiratory tract:  
10 gatekeeper to respiratory health. *Nat Rev Microbiol* 15:259-270.
- 11 2. Thaiss CA, Zmora N, Levy M, Elinav E. 2016. The microbiome and innate immunity. *Nature*  
12 535:65-74.
- 13 3. Karst SM. 2016. The influence of commensal bacteria on infection with enteric viruses. *Nat Rev*  
14 *Microbiol* 14:197-204.
- 15 4. Berger AK, Yi H, Kearns DB, Mainou BA. 2017. Bacteria and bacterial envelope components  
16 enhance mammalian reovirus thermostability. *PLoS Pathog* 13:e1006768.
- 17 5. Drexler JF, Corman VM, Drosten C. 2014. Ecology, evolution and classification of bat  
18 coronaviruses in the aftermath of SARS. *Antiviral Res* 101:45-56.
- 19 6. Gralinski LE, Menachery VD, Morgan AP, Totura AL, Beall A, Kocher J, Plante J, Harrison-Shostak  
20 DC, Schäfer A, Pardo-Manuel de Villena F, Ferris MT, Baric RS. 2017. Allelic Variation in the Toll-  
21 Like Receptor Adaptor Protein. *G3 (Bethesda)* 7:1653-1663.
- 22 7. Totura AL, Whitmore A, Agnihothram S, Schäfer A, Katze MG, Heise MT, Baric RS. 2015. Toll-Like  
23 Receptor 3 Signaling via TRIF Contributes to a Protective Innate Immune Response to Severe  
24 Acute Respiratory Syndrome Coronavirus Infection. *MBio* 6:e00638-15.
- 25 8. Sheahan T, Morrison TE, Funkhouser W, Uematsu S, Akira S, Baric RS, Heise MT. 2008. MyD88 is  
26 required for protection from lethal infection with a mouse-adapted SARS-CoV. *PLoS Pathog*  
27 4:e1000240.
- 28 9. Vollmer W, Blanot D, de Pedro MA. 2008. Peptidoglycan structure and architecture. *FEMS*  
29 *Microbiol Rev* 32:149-67.
- 30 10. Yang H, Li X, Yu H, Shen Z. 2015. Identification of lipopeptide isoforms by MALDI-TOF-MS/MS  
31 based on the simultaneous purification of iturin, fengycin, and surfactin by RP-HPLC. *Anal*  
32 *Bioanal Chem* 407:2529-42.
- 33 11. Cochrane SA, Vederas JC. 2016. Lipopeptides from *Bacillus* and *Paenibacillus* spp.: A Gold Mine  
34 of Antibiotic Candidates. *Med Res Rev* 36:4-31.
- 35 12. Meena KR, Kanwar SS. 2015. Lipopeptides as the antifungal and antibacterial agents:  
36 applications in food safety and therapeutics. *Biomed Res Int* 2015:473050.
- 37 13. Seydlová G, Svobodová J. 2008. Review of surfactin chemical properties and the potential  
38 biomedical applications. *Central European Journal of Medicine* 3:123-133.

- 1 14. Mustafa S, Balkhy H, Gabere MN. 2018. Current treatment options and the role of peptides as  
2 potential therapeutic components for Middle East Respiratory Syndrome (MERS): A review. *J*  
3 *Infect Public Health* 11:9-17.
- 4 15. World Health Organization. 2004. WHO SARS Risk Assessment and Preparedness Framework.  
5 WHO Press, Geneva.
- 6 16. World Health Organization. 2017. WHO MERS-CoV Global Summary and Assessment of Risk.  
7 WHO Press, Geneva.
- 8 17. Wang X, Hu W, Zhu L, Yang Q. 2017. *Bacillus subtilis* and surfactin inhibit the transmissible  
9 gastroenteritis virus from entering the intestinal epithelial cells. *Biosci Rep* 37.
- 10 18. Pang X, Zhao J, Fang X, Liu H, Zhang Y, Cen S, Yu L. 2017. Surfactin derivatives from  
11 *Micromonospora* sp. CCCC 202787 and their anti-HIV activities. *J Antibiot (Tokyo)* 70:105-108.
- 12 19. Yuan L, Zhang S, Wang Y, Li Y, Wang X, Yang Q. 2018. Surfactin Inhibits Membrane Fusion during  
13 Invasion of Epithelial Cells by Enveloped Viruses. *J Virol* 92.
- 14 20. Carrillo C, Teruel JA, Aranda FJ, Ortiz A. 2003. Molecular mechanism of membrane  
15 permeabilization by the peptide antibiotic surfactin. *Biochim Biophys Acta* 1611:91-7.
- 16 21. Ivanova PT, Myers DS, Milne SB, McClaren JL, Thomas PG, Brown HA. 2015. Lipid composition of  
17 viral envelope of three strains of influenza virus - not all viruses are created equal. *ACS Infect Dis*  
18 1:399-452.
- 19 22. van Meer G, Voelker DR, Feigenson GW. 2008. Membrane lipids: where they are and how they  
20 behave. *Nat Rev Mol Cell Biol* 9:112-24.
- 21 23. Harrison MS, Sakaguchi T, Schmitt AP. 2010. Paramyxovirus assembly and budding: building  
22 particles that transmit infections. *Int J Biochem Cell Biol* 42:1416-29.
- 23 24. Rossman JS, Lamb RA. 2011. Influenza virus assembly and budding. *Virology* 411:229-36.
- 24 25. Bavari S, Bosio CM, Wiegand E, Ruthel G, Will AB, Geisbert TW, Hevey M, Schmaljohn C,  
25 Schmaljohn A, Aman MJ. 2002. Lipid raft microdomains: a gateway for compartmentalized  
26 trafficking of Ebola and Marburg viruses. *J Exp Med* 195:593-602.
- 27 26. Brown RS, Wan JJ, Kielian M. 2018. The Alphavirus Exit Pathway: What We Know and What We  
28 Wish We Knew. *Viruses* 10.
- 29 27. Taylor SD, Palmer M. 2016. The action mechanism of daptomycin. *Bioorg Med Chem* 24:6253-  
30 6268.
- 31 28. She AQ, Gang HZ, Mu BZ. 2012. Temperature influence on the structure and interfacial  
32 properties of surfactin micelle: a molecular dynamics simulation study. *J Phys Chem B*  
33 116:12735-43.
- 34 29. Kuss SK, Best GT, Etheredge CA, Pruijssers AJ, Frierson JM, Hooper LV, Dermody TS, Pfeiffer JK.  
35 2011. Intestinal microbiota promote enteric virus replication and systemic pathogenesis. *Science*  
36 334:249-52.
- 37 30. de Steenhuijsen Piters WA, Sanders EA, Bogaert D. 2015. The role of the local microbial  
38 ecosystem in respiratory health and disease. *Philos Trans R Soc Lond B Biol Sci* 370.
- 39 31. Jeżewska-Frańkowiak J, Seroczyńska K, Banaszczyk J, Jedrzejczak G, Żylicz-Stachula A, Skowron  
40 PM. 2018. The promises and risks of probiotic *Bacillus* species. *Acta Biochim Pol* 65:509-519.
- 41 32. Burja AM, Abou-Mansour E, Banaigs B, Payri C, Burgess JG, Wright PC. 2002. Culture of the  
42 marine cyanobacterium, *Lyngbya majuscula* (Oscillatoriaceae), for bioprocess intensified  
43 production of cyclic and linear lipopeptides. *J Microbiol Methods* 48:207-19.
- 44 33. Morikawa M, Daido H, Takao T, Murata S, Shimonishi Y, Imanaka T. 1993. A new lipopeptide  
45 biosurfactant produced by *Arthrobacter* sp. strain MIS38. *J Bacteriol* 175:6459-66.
- 46 34. Dalili D, Amini M, Faramarzi MA, Fazeli MR, Khoshayand MR, Samadi N. 2015. Isolation and  
47 structural characterization of Coryxin, a novel cyclic lipopeptide from *Corynebacterium xerosis*  
48 NS5 having emulsifying and anti-biofilm activity. *Colloids Surf B Biointerfaces* 135:425-32.

- 1 35. Kindler E, Jónsdóttir HR, Muth D, Hamming OJ, Hartmann R, Rodriguez R, Geffers R, Fouchier RA,  
2 Drosten C, Müller MA, Dijkman R, Thiel V. 2013. Efficient replication of the novel human  
3 betacoronavirus EMC on primary human epithelium highlights its zoonotic potential. *MBio*  
4 4:e00611-12.
- 5 36. Roberts A, Deming D, Paddock CD, Cheng A, Yount B, Vogel L, Herman BD, Sheahan T, Heise M,  
6 Genrich GL, Zaki SR, Baric R, Subbarao K. 2007. A mouse-adapted SARS-coronavirus causes  
7 disease and mortality in BALB/c mice. *PLoS Pathog* 3:e5.
- 8 37. Sims AC, Tilton SC, Menachery VD, Gralinski LE, Schäfer A, Matzke MM, Webb-Robertson BJ,  
9 Chang J, Luna ML, Long CE, Shukla AK, Bankhead AR, Burkett SE, Zornetzer G, Tseng CT, Metz TO,  
10 Pickles R, McWeeney S, Smith RD, Katze MG, Waters KM, Baric RS. 2013. Release of severe acute  
11 respiratory syndrome coronavirus nuclear import block enhances host transcription in human  
12 lung cells. *J Virol* 87:3885-902.
- 13 38. Josset L, Menachery VD, Gralinski LE, Agnihothram S, Sova P, Carter VS, Yount BL, Graham RL,  
14 Baric RS, Katze MG. 2013. Cell host response to infection with novel human coronavirus EMC  
15 predicts potential antivirals and important differences with SARS coronavirus. *MBio* 4:e00165-  
16 13.
- 17 39. Bradrick SS, Lieben EA, Carden BM, Romero JR. 2001. A predicted secondary structural domain  
18 within the internal ribosome entry site of echovirus 12 mediates a cell-type-specific block to  
19 viral replication. *J Virol* 75:6472-81.
- 20 40. Plante KS, Rossi SL, Bergren NA, Seymour RL, Weaver SC. 2015. Extended Preclinical Safety,  
21 Efficacy and Stability Testing of a Live-attenuated Chikungunya Vaccine Candidate. *PLoS Negl*  
22 *Trop Dis* 9:e0004007.
- 23 41. Freiberg AN, Worthy MN, Lee B, Holbrook MR. 2010. Combined chloroquine and ribavirin  
24 treatment does not prevent death in a hamster model of Nipah and Hendra virus infection. *J*  
25 *Gen Virol* 91:765-72.
- 26 42. Bente DA, Alimonti JB, Shieh WJ, Camus G, Ströher U, Zaki S, Jones SM. 2010. Pathogenesis and  
27 immune response of Crimean-Congo hemorrhagic fever virus in a STAT-1 knockout mouse  
28 model. *J Virol* 84:11089-100.
- 29 43. Widman DG, Young E, Yount BL, Plante KS, Gallichotte EN, Carbaugh DL, Peck KM, Plante J,  
30 Swanstrom J, Heise MT, Lazear HM, Baric RS. 2017. A Reverse Genetics Platform That Spans the  
31 Zika Virus Family Tree. *MBio* 8.
- 32 44. Rajsbaum R, Albrecht RA, Wang MK, Maharaj NP, Versteeg GA, Nistal-Villán E, García-Sastre A,  
33 Gack MU. 2012. Species-specific inhibition of RIG-I ubiquitination and IFN induction by the  
34 influenza A virus NS1 protein. *PLoS Pathog* 8:e1003059.
- 35 45. Bharaj P, Atkins C, Luthra P, Giraldo MI, Dawes BE, Miorin L, Johnson JR, Krogan NJ, Basler CF,  
36 Freiberg AN, Rajsbaum R. 2017. The Host E3-Ubiquitin Ligase TRIM6 Ubiquitinates the Ebola  
37 Virus VP35 Protein and Promotes Virus Replication. *J Virol* 91.
- 38 46. Berryman MA, Rodewald RD. 1990. An enhanced method for post-embedding  
39 immunocytochemical staining which preserves cell membranes. *J Histochem Cytochem* 38:159-  
40 70.
- 41 47. Gilling DH, Kitajima M, Torrey JR, Bright KR. 2014. Mechanisms of antiviral action of plant  
42 antimicrobials against murine norovirus. *Appl Environ Microbiol* 80:4898-910.
- 43 48. Sheahan T, Whitmore A, Long K, Ferris M, Rockx B, Funkhouser W, Donaldson E, Gralinski L,  
44 Collier M, Heise M, Davis N, Johnston R, Baric RS. 2011. Successful vaccination strategies that  
45 protect aged mice from lethal challenge from influenza virus and heterologous severe acute  
46 respiratory syndrome coronavirus. *J Virol* 85:217-30.

## 1 **Figure Legends**

### 2 **Figure 1: Peptidoglycan from *Bacillus subtilis* reduces coronavirus infectivity.** (A)

3 Bacterial envelope components such as LPS are bound to CoVs, increasing their thermostability  
4 (right) relative to untreated samples (left). (B) Relative infectivity of HCoV-229E (n=4) and  
5 MERS-CoV (n=5) after treatment with PBS alone (black), LPS from *Escherichia coli* (grey), or  
6 PG from *B. subtilis* (green) following 2 hour incubation at 37°C. (C) HCoV-299E (circles) and  
7 MERS-CoV (triangles) infectivity after treatment for 2 hours at 37°C with peptidoglycan from the  
8 indicated bacterial species (n=3). (D) HCoV-229E and (E) MERS-CoV after treatment with PG  
9 from *B. subtilis* at room temperature (RT), 32°C, and 37°C (n=3). For all dot plots, the centered  
10 bar represents the group mean while the error bars represent SD. P-values are based on the  
11 two-tailed Student's *t* test as indicated: \*  $P < 0.05$ , \*\*  $P < 0.01$ , \*\*\*  $P < 0.001$ .

### 12 **Figure 2: Identification of surfactin from *B. subtilis* peptidoglycan.** (A and B) PG from *B.*

13 *subtilis* in a PBS solution was clarified, washed with the indicated solvents, and clarified again.  
14 Supernatants were decanted and retained, while the insoluble fractions were resuspended in  
15 PBS. The (A) insoluble fraction and (B) supernatants were then used to treat HCoV-229E and  
16 relative infectivity determined (n=3). (C, D, and E) Mass spectrometry performed was performed  
17 on PG (C) and ethanol wash (D). The peak corresponding to the molecular mass 1058 in the  
18 ethanol wash was then further fragmented (E) to determine the identity of the molecule.  
19 Representative spectra shown. For all dot plots, the centered bar represents the group mean  
20 and error bars the SD.

### 21 **Figure 3: Characterization of CoV inhibition by surfactin.** (A) HCoV-229E, (B) MERS-CoV,

22 and (C) SARS-CoV (MA15) were treated PBS alone (black) or surfactin (red) and at room  
23 temperature (RT), 32°C, and 37°C and infectivity determined (n=3). HCoV-229E (D) and MERS-  
24 CoV (E) were treated for the indicated time at 4°C (light orange), RT (dark orange), 32°C (light  
25 red), or 37°C (dark red) and infectivity determined (n=3). (F) HCoV-229E (blue), MERS-CoV  
26 (orange), and SARS-CoV MA15 (green) were diluted over a range of concentrations of surfactin

1 and viral infectivity determined (n=3). For dot plots, each point represents the titer from an  
2 independent experiment while the group mean is indicated by a line. Each point on the line  
3 graph represents the group mean. All error bars represent SD. The two tailed students t-test  
4 was used to determine P-values: \*  $P < 0.05$ , \*\*  $P < 0.01$ , \*\*\*  $P < 0.001$ .

5 **Figure 4: Surfactin disrupts CoV structural integrity.** (A) HCoV-229E and (B) MERS-CoV  
6 were treated with the indicated concentrations of surfactin. Viral infectivity was then determined  
7 (red) or samples were then treated with RNase I, RNA extracted, and viral genome copy  
8 number determined by RT-qPCR (black). (C and D) PBS or surfactin treated HCoV-229E  
9 samples negatively stained and examined by TEM and virions counted (n=3). Representative  
10 micrograph shown in (C) while total counts are displayed in (D). Horizontal lines represent group  
11 mean while error bars represent SD. Two-tailed students t-test determined significance: \*  $P <$   
12  $0.05$ , \*\*  $P < 0.01$ , \*\*\*  $P < 0.001$ .

13 **Figure 5: *In vivo* characterization of surfactin treatment on SARS-CoV infection.** (A and B)  
14 BALB/C mice were then intranasally infected with  $10^4$  PFU of PBS (black) or surfactin (red)  
15 treated SARS-CoV MA15 and (A) monitored for weight loss over 4 days. Dotted lines and  
16 triangles represent mock infected animals with PBS alone (black) or surfactin alone (red). (B)  
17 Lung tissue was harvested and viral titer determined at day 2 and day 4. n=4 for all infected  
18 groups, n=2 for mock groups. (C and D) BALB/C mice were pretreated intranasally with 50  $\mu$ l of  
19 either PBS (black) or surfactin in PBS (red). 18 hours later, BALB/C mice were infected with  $10^4$   
20 PFU of SARS-CoV (MA15) and (C) monitored for weight loss over 4 days. (D) Lung titer  
21 determined 2- (n=5) and 4-days post infection (n=10). Dots on line graphs and bars on bar  
22 graphs represent the group mean. ND indicates that no titers were detected. All error bars  
23 represent SD. P-values were calculated using the two-tailed student's t-test, with: \*  $P < 0.05$ , \*\*  
24  $P < 0.01$ , \*\*\*  $P < 0.001$ .

25

1 **Figure 6: Surfactin, but not other cyclic lipopeptides, broadly reduce the infectivity of**  
2 **enveloped viruses.** (A) Biochemical models of each of the seven cyclic lipopeptides tested.  
3 The number of amino acids present in the cyclic ring are shown in parentheses. (B) HCoV-229E  
4 (blue) and MERS-CoV (grey) were treated with PBS or the indicated cyclic lipopeptides in PBS  
5 and incubated for 2 hours at 37°C. Viral infectivity was then determined (n=3). (C) The indicated  
6 viruses were diluted PBS (black) or surfactin (red), incubated for 2 hours at 37°C, and viral  
7 infectivity determined (n=3). Viruses are abbreviated as follows: Coxsackievirus (CVB3), Dugbe  
8 (DUGV), Crimean-Congo hemorrhagic fever (CCHFV), Zika (ZIKV), Nipah (NiV), and  
9 Chikungunya (CHIKV), Una, Mayaro, Influenza A strains H1N1 and H3N2, and Ebola (EBOV).  
10 Bar graph bars represent the group means. Error bars represent SD. ND indicates that no titers  
11 were detected. The student's t-test was used to calculate p-values, with: \*  $P < 0.05$ , \*\*  $P < 0.01$ ,  
12 \*\*\*  $P < 0.001$ .  
13

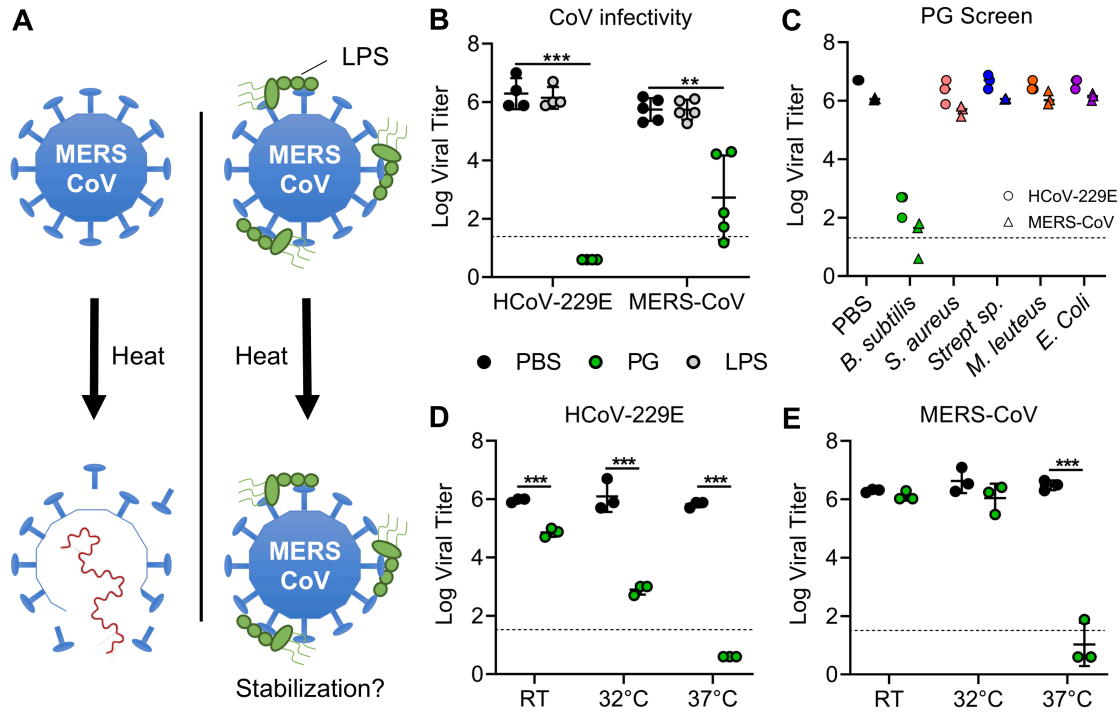

**Figure 1: Peptidoglycan from *Bacillus subtilis* reduces coronavirus infectivity.** (A) Bacterial envelope components such as LPS are bound to CoVs, increasing their thermostability (right) relative to untreated samples (left). (B) Relative infectivity of HCoV-229E (n=4) and MERS-CoV (n=5) after treatment with PBS alone (black), LPS from *Escherichia coli* (grey), or PG from *B. subtilis* (green) following 2 hour incubation at 37°C. (C) HCoV-229E (circles) and MERS-CoV (triangles) infectivity after treatment for 2 hours at 37°C with peptidoglycan from the indicated bacterial species (n=3). (D) HCoV-229E and (E) MERS-CoV after treatment with PG from *B. subtilis* at room temperature (RT), 32°C, and 37°C (n=3). For all dot plots, the centered bar represents the group mean while the error bars represent SD. P-values are based on the two-tailed Student's *t* test as indicated: \*  $P < 0.05$ , \*\*  $P < 0.01$ , \*\*\*  $P < 0.001$ .



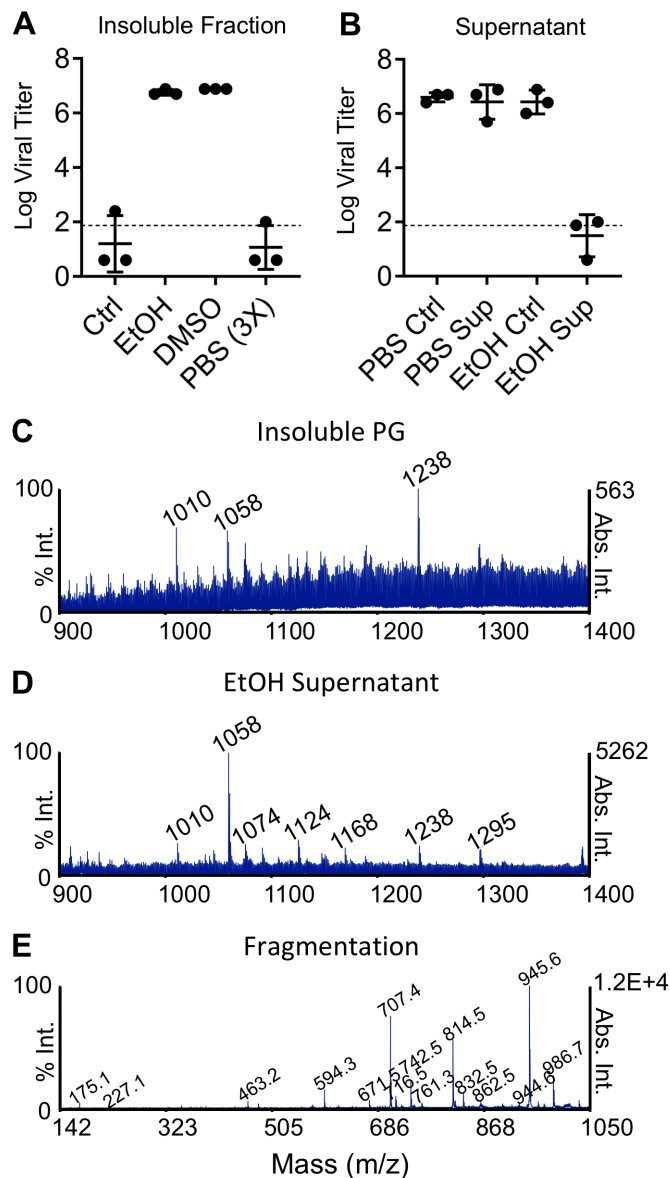

**Figure 2:** Identification of surfactin from *B. subtilis* peptidoglycan. (A and B) PG from *B. subtilis* in a PBS solution was clarified, washed with the indicated solvents, and clarified again. Supernatants were decanted and retained, while the insoluble fractions were resuspended in PBS. The (A) insoluble fraction and (B) supernatants were then used to treat HCoV-229E and relative infectivity determined ( $n=3$ ). (C, D, and E) Mass spectrometry performed was performed on PG (C) and ethanol wash (D). The peak corresponding to the molecular mass 1058 in the ethanol wash was then further fragmented (E) to determine the identity of the molecule. Representative spectra shown. For all dot plots, the centered bar represents the group mean and error bars the SD.

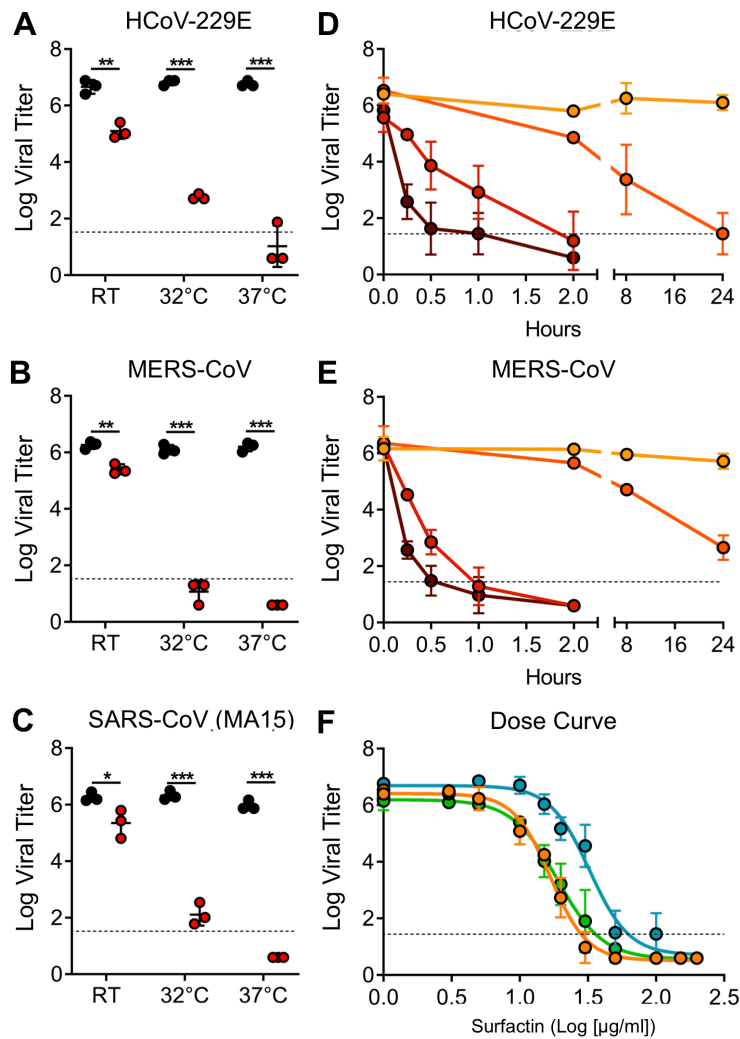

**Figure 3: Characterization of CoV inhibition by surfactin.** (A) HCoV-229E, (B) MERS-CoV, and (C) SARS-CoV (MA15) were treated PBS alone (black) or surfactin (red) and at room temperature (RT), 32°C, and 37°C and infectivity determined (n=3). HCoV-229E (D) and MERS-CoV (E) were treated for the indicated time at 4°C (light orange), RT (dark orange), 32°C (light red), or 37°C (dark red) and infectivity determined (n=3). (F) HCoV-229E (blue), MERS-CoV (orange), and SARS-CoV MA15 (green) were diluted over a range of concentrations of surfactin and viral infectivity determined (n=3). For dot plots, each point represents the titer from an independent experiment while the group mean is indicated by a line. Each point on the line graph represents the group mean. All error bars represent SD. The two tailed students t-test was used to determine P-values: \*  $P < 0.05$ , \*\*  $P < 0.01$ , \*\*\*  $P < 0.001$ .

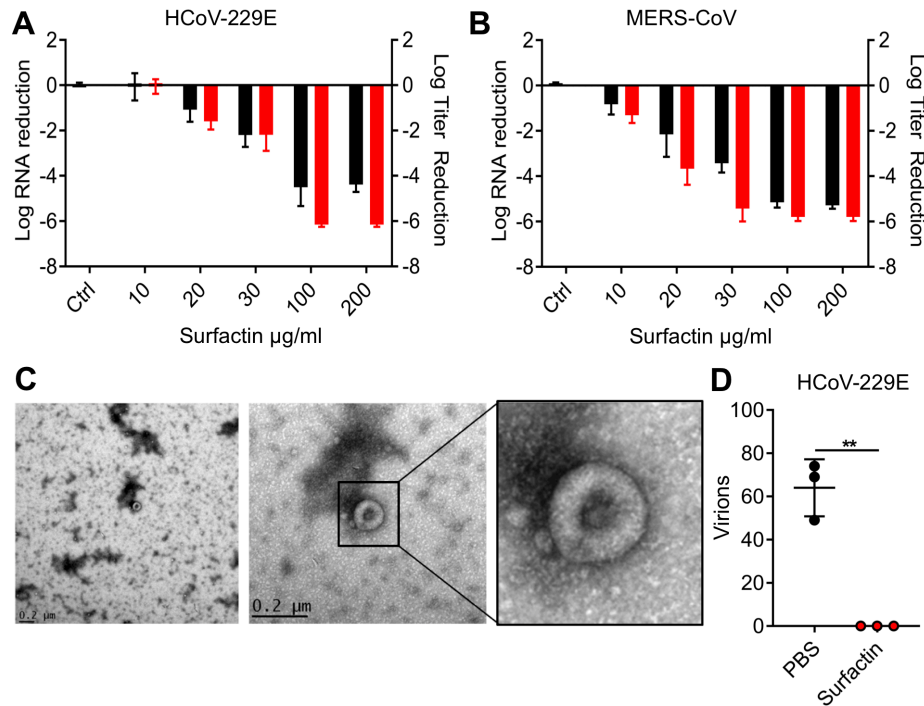

**Figure 4: Surfactin disrupts CoV structural integrity.** (A) HCoV-229E and (B) MERS-CoV were treated with the indicated concentrations of surfactin. Viral infectivity was then determined (red) or samples were then treated with RNase I, RNA extracted, and viral genome copy number determined by RT-qPCR (black). (C and D) PBS or surfactin treated HCoV-229E samples negatively stained and examined by TEM and virions counted (n=3). Representative micrograph shown in (C) while total counts are displayed in (D). Horizontal lines represent group mean while error bars represent SD. Two-tailed students t-test determined significance: \*  $P < 0.05$ , \*\*  $P < 0.01$ , \*\*\*  $P < 0.001$ .

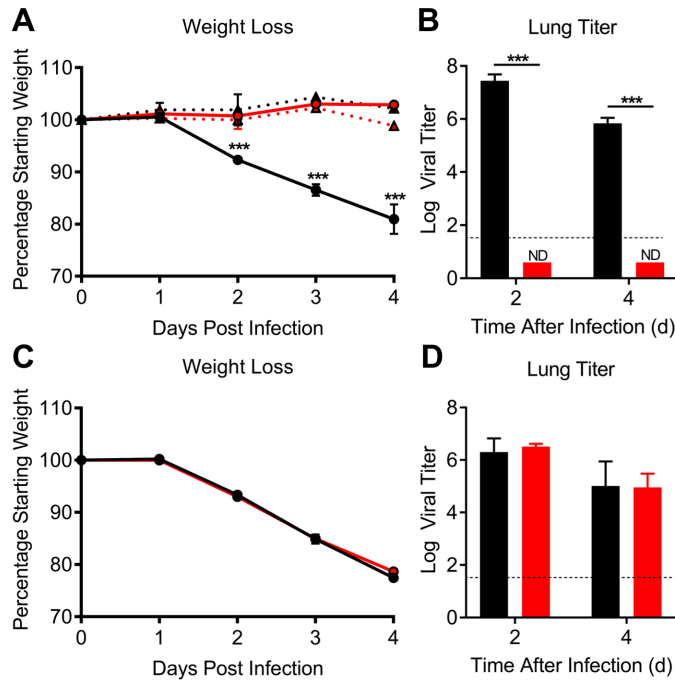

**Figure 5: *In vivo* characterization of surfactin treatment on SARS-CoV infection.** (A and B) BALB/C mice were then intranasally infected with  $10^4$  PFU of PBS (black) or surfactin (red) treated SARS-CoV MA15 and (A) monitored for weight loss over 4 days. Dotted lines and triangles represent mock infected animals with PBS alone (black) or surfactin alone (red). (B) Lung tissue was harvested and viral titer determined at day 2 and day 4.  $n=4$  for all infected groups,  $n=2$  for mock groups. (C and D) BALB/C mice were pretreated intranasally with 50  $\mu$ l of either PBS (black) or surfactin in PBS (red). 18 hours later, BALB/C mice were infected with  $10^4$  PFU of SARS-CoV (MA15) and (C) monitored for weight loss over 4 days. (D) Lung titer determined 2- ( $n=5$ ) and 4- days post infection ( $n=10$ ). Dots on line graphs and bars on bar graphs represent the group mean. ND indicates that no titers were detected. All error bars represent SD. P-values were calculated using the two-tailed student's t-test, with: \*  $P < 0.05$ , \*\*  $P < 0.01$ , \*\*\*  $P < 0.001$ .

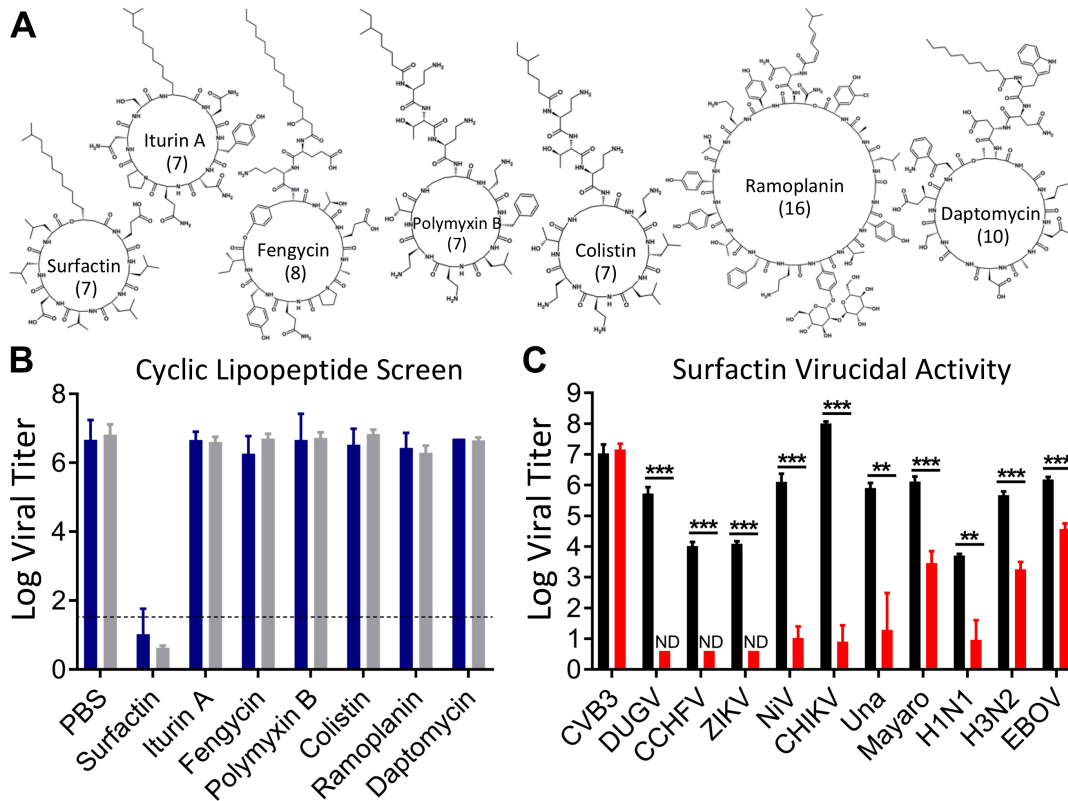

**Figure 6: Surfactin, but not other cyclic lipopeptides, broadly reduce the infectivity of enveloped viruses.** (A) Biochemical models of each of the seven cyclic lipopeptides tested. The number of amino acids present in the cyclic ring are shown in parentheses. (B) HCoV-229E (blue) and MERS-CoV (grey) were treated with PBS or the indicated cyclic lipopeptides in PBS and incubated for 2 hours at 37°C. Viral infectivity was then determined (n=3). (C) The indicated viruses were diluted PBS (black) or surfactin (red), incubated for 2 hours at 37°C, and viral infectivity determined (n=3). Viruses are abbreviated as follows: Coxsackievirus (CVB3), Dugbe (DUGV), Crimean-Congo hemorrhagic fever (CCHFV), Zika (ZIKV), Nipah (NiV), and Chikungunya (CHIKV), Una, Mayaro, Influenza A strains H1N1 and H3N2, and Ebola (EBOV). Bar graph bars represent the group means. Error bars represent SD. ND indicates that no titers were detected. The student's t-test was used to calculate p-values, with: \*  $P < 0.05$ , \*\*  $P < 0.01$ , \*\*\*  $P < 0.001$ .
